# Supplementary material for: Luminescent iridium complexes for detection of molybdate
Source: Royal Society of Chemistry journal article supplement (doi:10.1039/c1dt11360g), 2011-10-24
Supplement: c1dt11360g.pdf [file c1dt11360g.pdf]

**Supporting information:**  
**Luminescent iridium complexes for detection of molybdate.**

**Carmen E. Castillo,<sup>b,c</sup> David L. Davies,<sup>\*a</sup> Anne-K. Duhme Klair,<sup>\*b</sup> Kuldip Singh<sup>a</sup> and Shalini Singh<sup>a</sup>**

Figures are numbered as in the paper

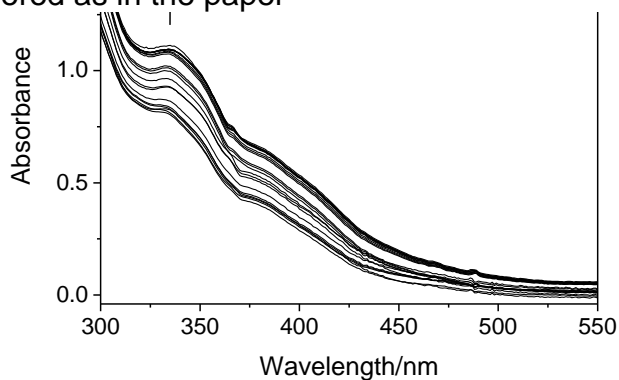

**Figure 3(i)** Absorption spectra recorded between pH 0.8 and 11.2 during the titration of an acidic solution (0.041 mM) of  $[\text{H}_2\text{-3c}]^+$  in aqueous acetonitrile (5% water) with  $[\text{Me}_4\text{N}]\text{OH}$ .

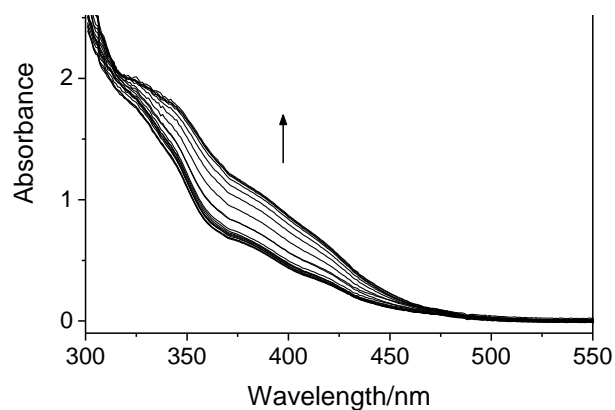

**Figure 3(ii)**. Absorption spectra recorded between pH 0.2 and 10.7 during the titration of an acidic solution (0.083 mM) of  $[\text{H}_2\text{-3d}]^+$  in aqueous acetonitrile (5% water) with  $[\text{Me}_4\text{N}]\text{OH}$ .

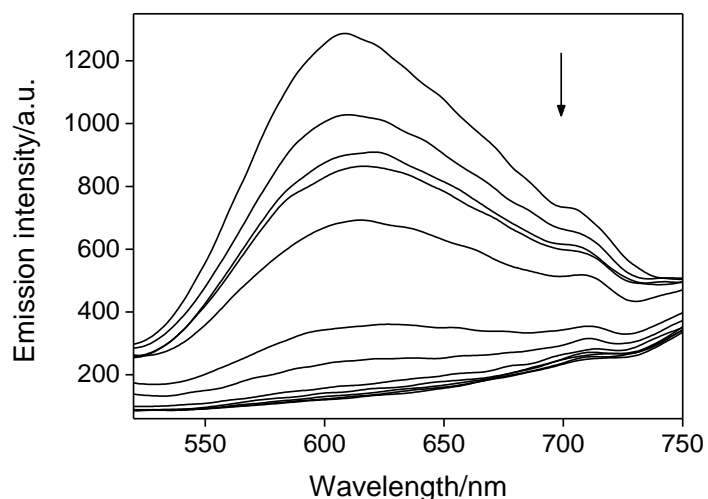

**Figure 4(i)** Selected emission spectra ( $\lambda_{\text{exc}} = 330$  nm, 350 nm filter) recorded between pH 3.3 and 11.2 during the titration of an acidic solution (0.041 mM) of [H<sub>2</sub>-3c]<sup>+</sup> in aqueous acetonitrile (5% water) with [Me<sub>4</sub>N]OH.

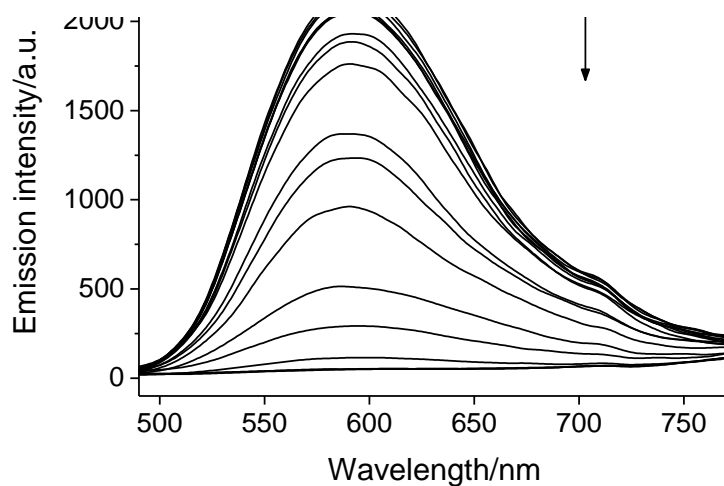

**Figure 4(ii)** Selected emission spectra ( $\lambda_{\text{exc}} = 400$  nm) recorded between pH 0.2 and 10.6 during the titration of an acidic solution (0.083 mM) of [H<sub>2</sub>-3d]<sup>+</sup> in aqueous acetonitrile (5% water) with [Me<sub>4</sub>N]OH.

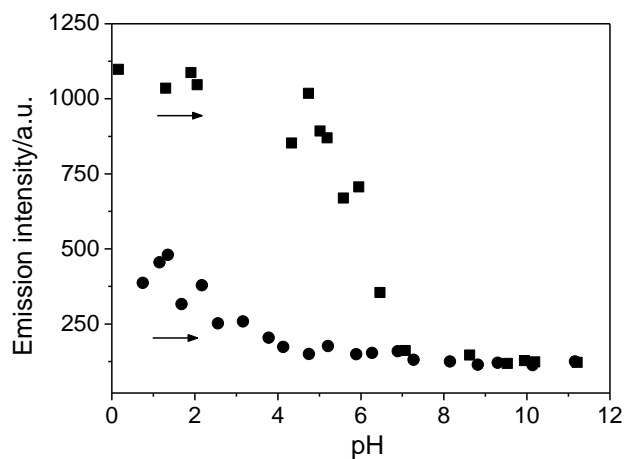

**Figure 5(i)** Emission intensity at 610 nm as a function of pH for  $[\text{H}_2\text{-3c}]^+$  (squares) and  $[\text{H}_2\text{-3c}]^+$  + 0.5 equiv. molybdate (circles) (0.041 mM solutions in aqueous acetonitrile).

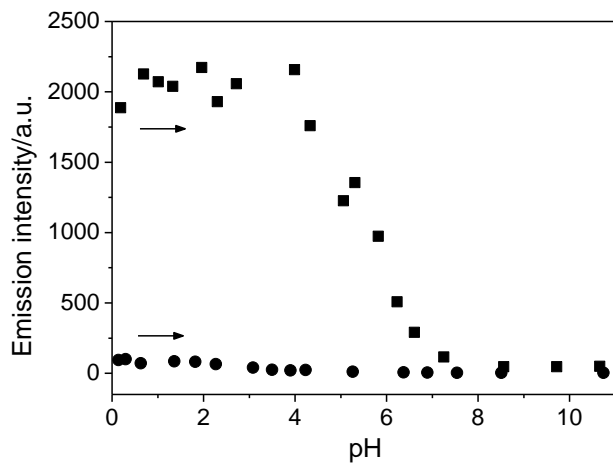

**Figure 5(ii)** Emission intensity at 588 nm as a function of pH for  $[\text{H}_2\text{-3d}]^+$  (squares) and  $[\text{H}_2\text{-3d}]^+$  + 0.5 equiv. molybdate (circles) (0.083 mM solutions in aqueous acetonitrile).

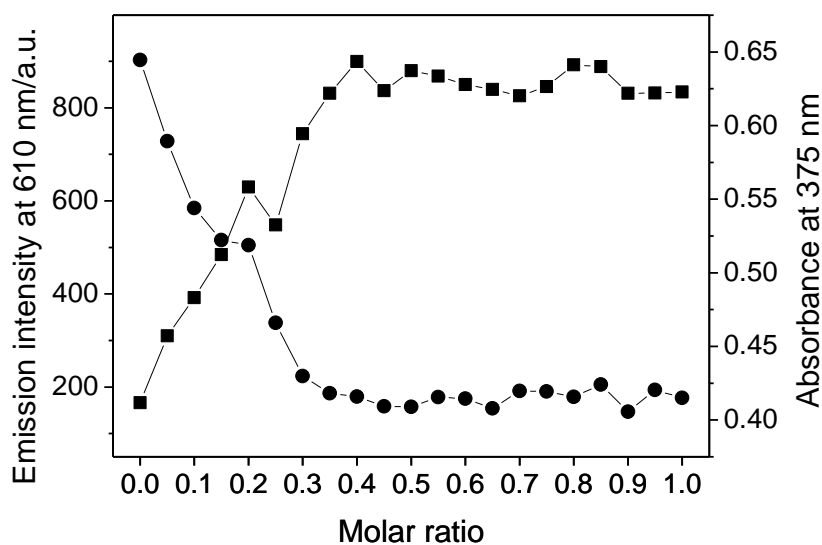

**Figure 6(i)** Emission intensity at 610 nm (circles) and absorbance at 375 nm (squares) of a 0.042 mM solution of **3c** in aqueous acetonitrile at pH 4.7 as a function of molar  $\text{MoO}_4^{2-}$  fractions.

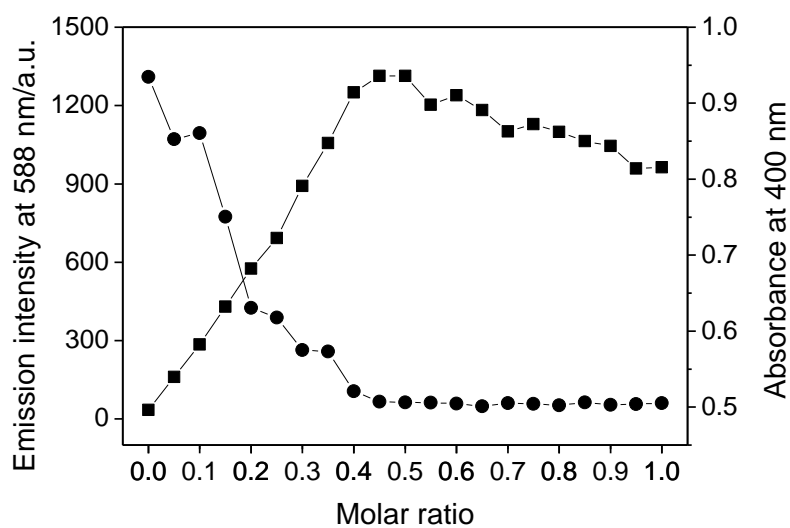

**Figure 6(ii)** Emission intensity at 588 nm (circles) and absorbance at 400 nm (squares) of a 0.083 mM solution of **3d** in aqueous acetonitrile at pH 4.1 as a function of molar  $\text{MoO}_4^{2-}$  fractions.
